# Supplementary material
Source: PubMed Central journal article supplement (PMC2785339)
Supplement: supp_M109.036871_Fig_S1.pdf [file supp_M109.036871_Fig_S1.pdf]

Fig. S1

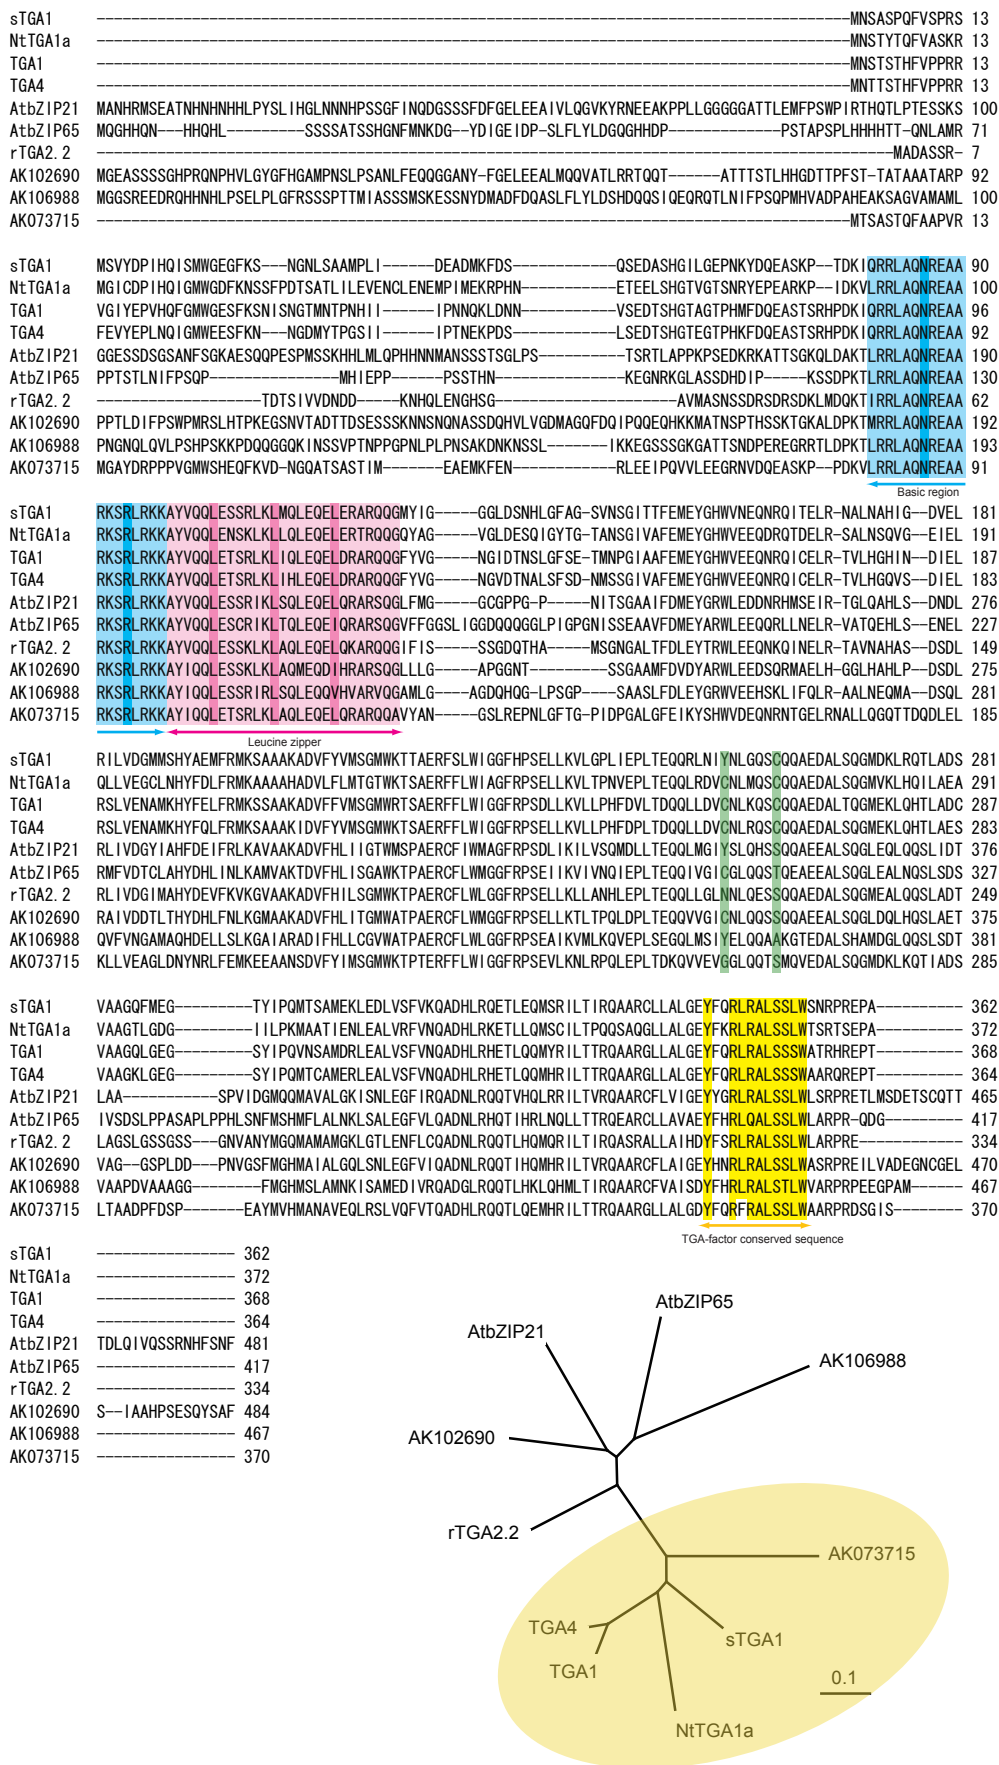

Fig. S1. Comparison of the amino acid sequences of AK073715, AK102690, and AK106988 to those of plant TGA factors, including sTGA1 (soybean TGA1, AAA75414), NtTGA1a (tobacco TGA1a, S17715), TGA1, TGA4, AtbZIP21, AtbZIP65 (Arabidopsis TGA factors, Q39237, Q39162, CAC40022, CAC40649, respectively), and rTGA2.2 (rice TGA factor, BAB72062). Basic regions, leucine zippers, and the TGA-factor conserved sequences are colored (blue, red, and yellow, respectively). Positions of cysteine residues that are involved in redox status of Arabidopsis TGA1 are also colored in green boxes. Asterisks indicate the signal peptide for nuclear localization (bipartile pattern). These amino acid sequences were compared using the program CLUSTALW. Phylogenetic tree was generated from the resulting alignment using the program TREEVIEW.
