# Supplementary material
Source: PubMed Central journal article supplement (PMC2785339)
Supplement: supp_M109.036871_Fig_S2.pdf [file supp_M109.036871_Fig_S2.pdf]

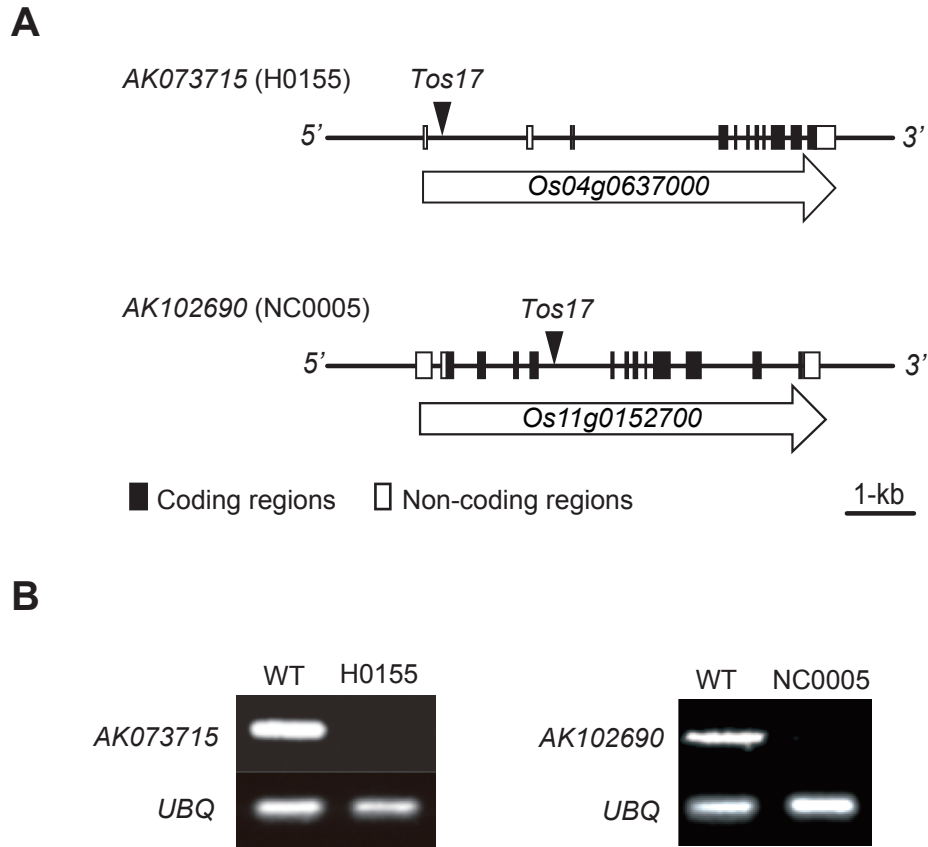

**Figure S2.** Characterization of the H0155 and NC0005 mutants. Cultured cells of these mutants were used for the experiments. (A) Genomic organization and *Tos17* insertion site of *AK073715* and *AK102690*. Exons (black boxes) and 5'-UTR and 3'-UTR (white boxes) are indicated. Black triangles represent the positions of the *Tos17* insertions. (B) RT-PCR analysis confirmed the expression of *AK073715* and *AK102690* in the elicitor-treated H0155 and NC0005 mutant and wild-type (WT) cultured cells. Total RNA prepared 4 h after elicitor treatment was subjected to RT-PCR. Expression of the *UBQ* gene was used as a control.
