# Supplementary material
Source: PubMed Central journal article supplement (PMC2785339)
Supplement: supp_M109.036871_Fig_S3.pdf [file supp_M109.036871_Fig_S3.pdf]

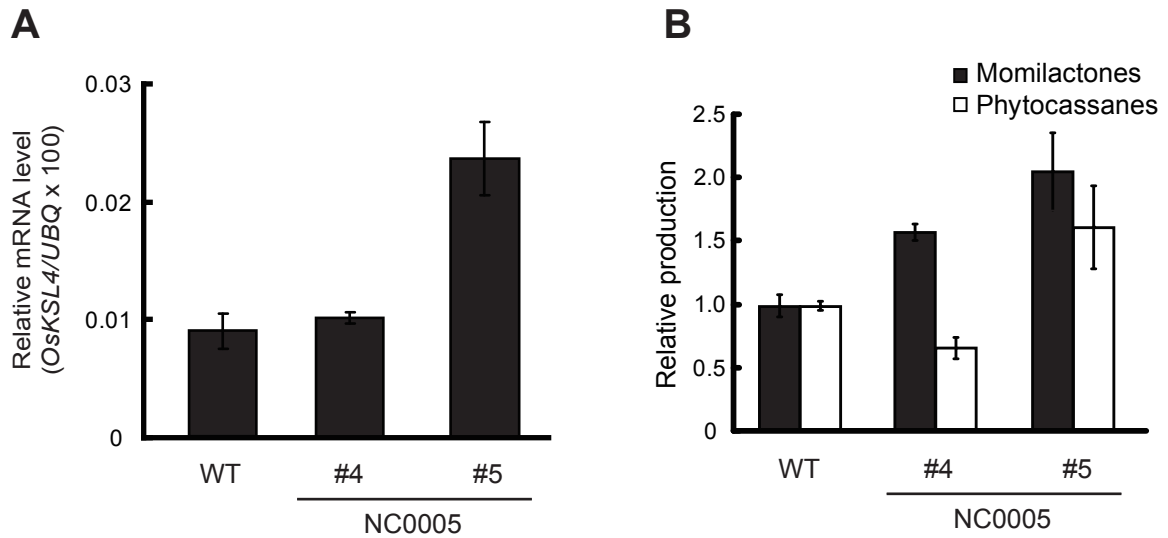

**Figure S3.** (A) Expression of *OsKSL4* in elicitor-treated NC0005 mutant analyzed by qRT-PCR. Cultured cells of the mutant were used for the analysis. Total RNA was prepared 6 h after elicitor treatment. The results are the average of at least three independent experiments, and values of *OsKSL4* mRNA expression were normalized to the expression of the *UBQ* gene. Bars indicate the means  $\pm$  SD. (B) Production of phytoalexins in cultured cells of the mutant. Momilactone (black bar) and phytocassane (open bar) levels in the culture medium collected 48 h after elicitor treatment were determined by LC-MS/MS. The results are the average of at least three independent experiments. Phytoalexin levels are shown relative to the amount in wild-type cells. Bars indicate the means  $\pm$  SD.
