# Supplementary material
Source: PubMed Central journal article supplement (PMC2785339)
Supplement: supp_M109.036871_Table_S1.pdf [file supp_M109.036871_Table_S1.pdf]

**Table S1 Oligonucleotides**

| Name                             | Sequence (5'-3')                                                                |
|----------------------------------|---------------------------------------------------------------------------------|
| <i>Tos17 mutant genotyping</i>   |                                                                                 |
| H0155-F                          | ATCTTGAGGTTTGGGGGTTT                                                            |
| H0155-R                          | TCCCAAAGCAGCAAGAAAT                                                             |
| <i>Tos17-Forward</i>             | ATTGTTAGGTTGCAAGTTAGTTAAGA                                                      |
| <i>Expression analysis</i>       |                                                                                 |
| UBQ-F                            | TCCGAGAGATGGGTTTCATC                                                            |
| UBQ-R                            | GCCAAGATTGCCAAGAAGAC                                                            |
| OsCPS4-F                         | TGACGAGGCTGGGCATATC                                                             |
| OsCPS4-R                         | TCTGGAGTCCAGTTCCTGAAA                                                           |
| OsKSL4-F                         | CGCCTTTGTA ACTCTAAGGTA                                                          |
| OsKSL4-R                         | ACGTAAAAGGCTTGTATATC                                                            |
| OsMAS-F                          | AAATGATTTGGGACCAGTGG                                                            |
| OsMAS-R                          | GACAGAATCTAGCTAGCGATGGA                                                         |
| CYP99A2-F                        | ATACGGCTCCTACCCAAAGC                                                            |
| CYP99A2-R                        | CATTATTCCGGGGACAAACAT                                                           |
| CYP99A3-F                        | TCGCTTACGTGCTTGCATAC                                                            |
| CYP99A3-R                        | CAAAGCACGGGGTATCAACT                                                            |
| OsKSL7-F                         | TTCATCTCTGTCACTTTTTCTTTTT                                                       |
| OsKSL7-R                         | ATCCCAACGAAGTCATCCAC                                                            |
| OsDXS3-F                         | GGGGGAGGTTCCAGTAAGAA                                                            |
| OsDXS3-R                         | TCATTTTGCATTTGGAAGCA                                                            |
| Os04g0177600-F                   | CTCGTATTGTGCGCATCAGGA                                                           |
| Os04g0177600-R                   | TGCAACTCATGCACAGCATA                                                            |
| Os04g0180900-F                   | GGCAGGATGACTTTGTGTCC                                                            |
| Os04g0180900-R                   | TCCATTACAGTGAAGCAAATCG                                                          |
| OsTGAP1q-F                       | ATGGCCAGTGAAGGATGAAG                                                            |
| OsTGAP1q-R                       | CTCTTGTGCCACATCAGAA                                                             |
| OsZIP21q-F                       | TTCAAAGTAGGGAGCAAAGC                                                            |
| OsZIP21q-R                       | GCAATCCCATTTCATCCATC                                                            |
| <i>Promoter assay (deletion)</i> |                                                                                 |
| KSL4p-1928-F                     | AAAAG <u>GGTACC</u> CTTGTACATACATCTCGAAG                                        |
| KSL4p-1224-F                     | AAAAG <u>GGTACC</u> CCATGGATATTCCACCAA                                          |
| KSL4p-991-F                      | AAAAG <u>GGTACC</u> AGCTGGATAGATTTCAGGATC                                       |
| KSL4p-414-F                      | AAAG <u>GGTACC</u> AATGATATTTCTCGTTTTGCG<br>( <i>Kpn</i> I site is underlined); |
| KSL4p-R                          | AAA <u>ACTCGAGA</u> ACTAACAATGTTGCAGGCC<br>( <i>Xho</i> I site is underlined).  |

**Table S1 Oligonucleotides (continue)**

| <b>Name</b>                      | <b>Sequence (5'-3')</b>                                              |
|----------------------------------|----------------------------------------------------------------------|
| <i>Promoter assay (mutation)</i> |                                                                      |
| m1-F                             | TATAAACCAGGACT <u>AGGG</u> GAAAAACACATGC                             |
| m1-R                             | CATGTGTTTTTCCCTAGTCCTGGTTTATAG                                       |
| m2-F                             | AAGTCCAGGT <u>TAGGT</u> CTCGCAGACTCGCAC                              |
| m2-R                             | TGCGAGAC <u>CTAAC</u> CTGGACTTCTGTGAATG                              |
| m3-F                             | CTACTTTATCAAC <u>CTAGT</u> ACGACCAAATA                               |
| m3-R                             | ATTTTGGTCGTACT <u>AGGTT</u> GATAAAGTAGC                              |
| m4-F                             | CCAAAATAATGTT <u>CCTAA</u> AGCTGGAGATAT                              |
| m4-R                             | TCTCCAGCTTT <u>AGGA</u> ACATTATTTTGGTCG                              |
| <i>Ttransactivation assay</i>    |                                                                      |
| OsTGAP1-F                        | CACCATGGAGCTTTACCCTGGCTAT                                            |
| OsTGAP1-R                        | AAACTCGAGTTAGCTTATCCCTGAATCGC<br>( <i>Xho</i> I site is under lined) |
| <i>Gel-shift assay</i>           |                                                                      |
| P1-F                             | CGTTGCTCACCATTACAGA                                                  |
| P1-R                             | TCAAATCAGTGCGAGTCTGC                                                 |
